# Supplementary material for: Fuelling conditions at staging sites can mitigate Arctic warming effects in a migratory bird
Source: PubMed Central journal article supplement (PMC6189115; doi:10.1038/s41467-018-06673-5), 2018-10-15
Supplement: 41467_2018_6673_MOESM1_ESM.pdf [file 41467_2018_6673_MOESM1_ESM.pdf]

Supplementary Information for

**Fuelling conditions at staging sites can mitigate Arctic warming effects in a migratory bird**

Eldar Rakhimberdiev\*, Sjoerd Duijns, Julia Karagicheva, Cornelis J. Camphuysen, VRS Castricum, Anne Dekinga, Rob Dekker, Anatoly Gavrilov, Job ten Horn, Joop Jukema, Anatoly Saveliev, Mikhail Soloviev, T. Lee Tibbitts, Jan A. van Gils, Theunis Piersma.

correspondence to: [eldarrak@gmail.com](mailto:eldarrak@gmail.com)

This PDF file includes:

Supplementary Figure 1 to 2

Supplementary Table 1 to 2

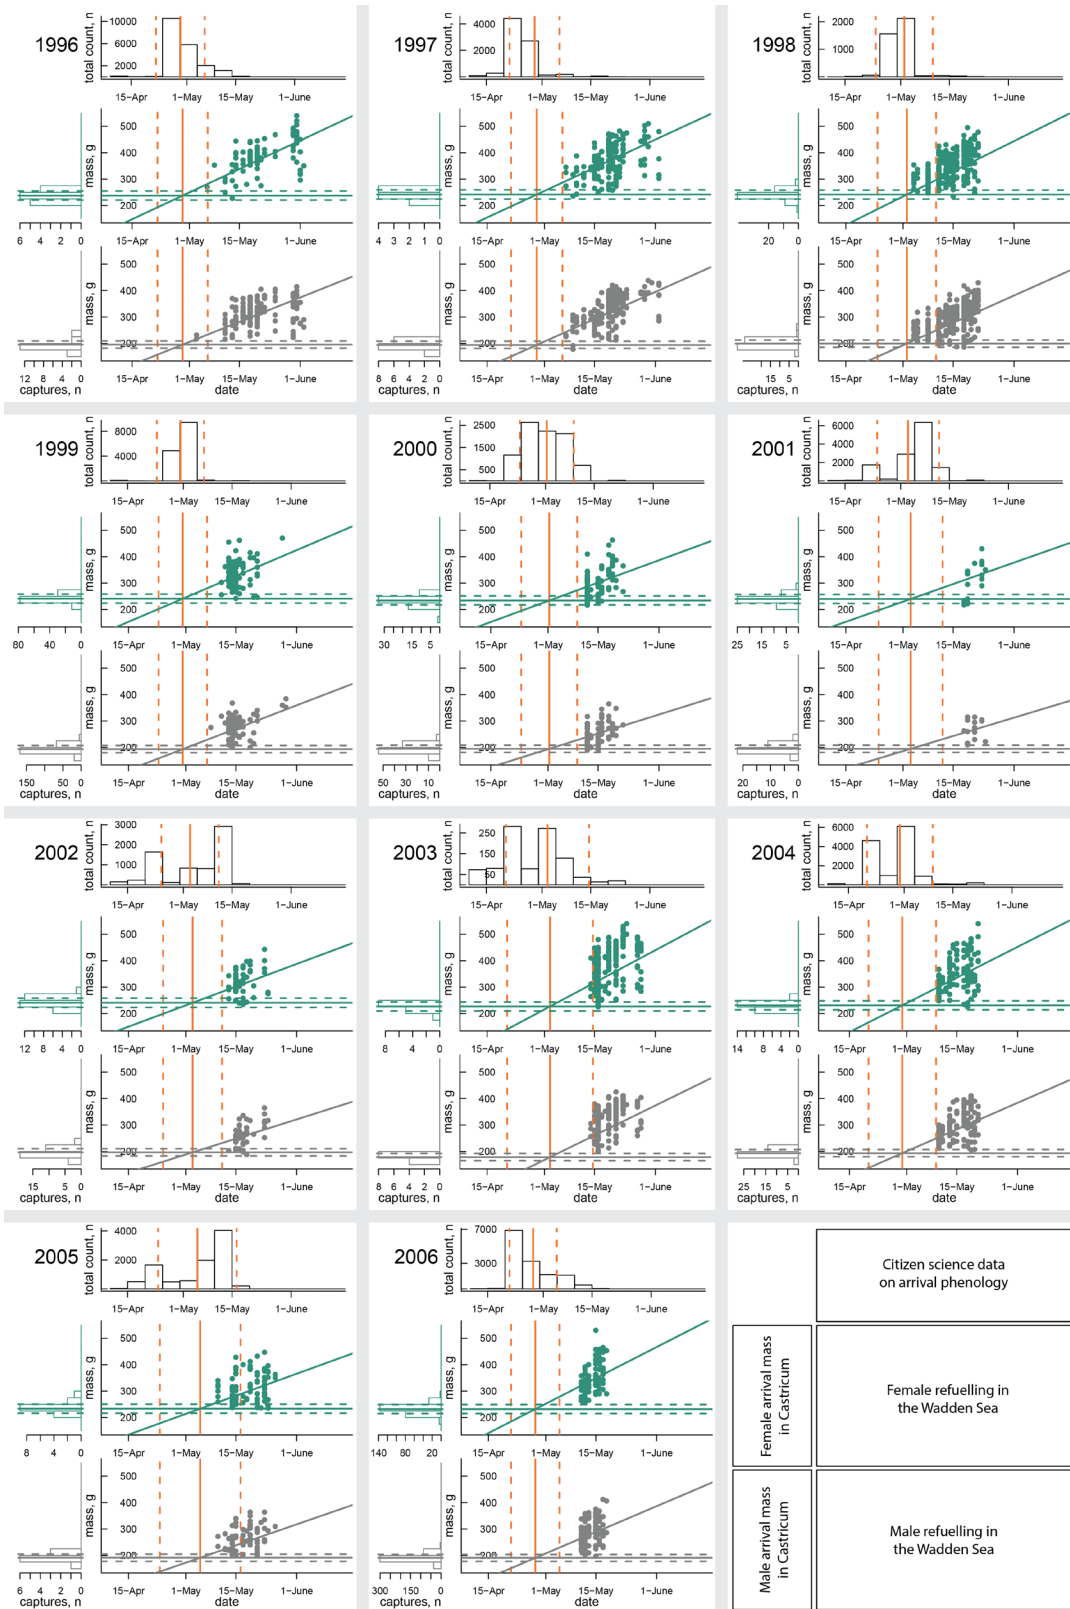

**Supplementary Figure 1.** Raw data and modelled results for citizen science arrival dates in the Netherlands (trektellen.nl), sex-specific arrival mass in captures in Castricum and refuelling in the Wadden Sea for 1996 – 2006. See Fig. 3 for more details.

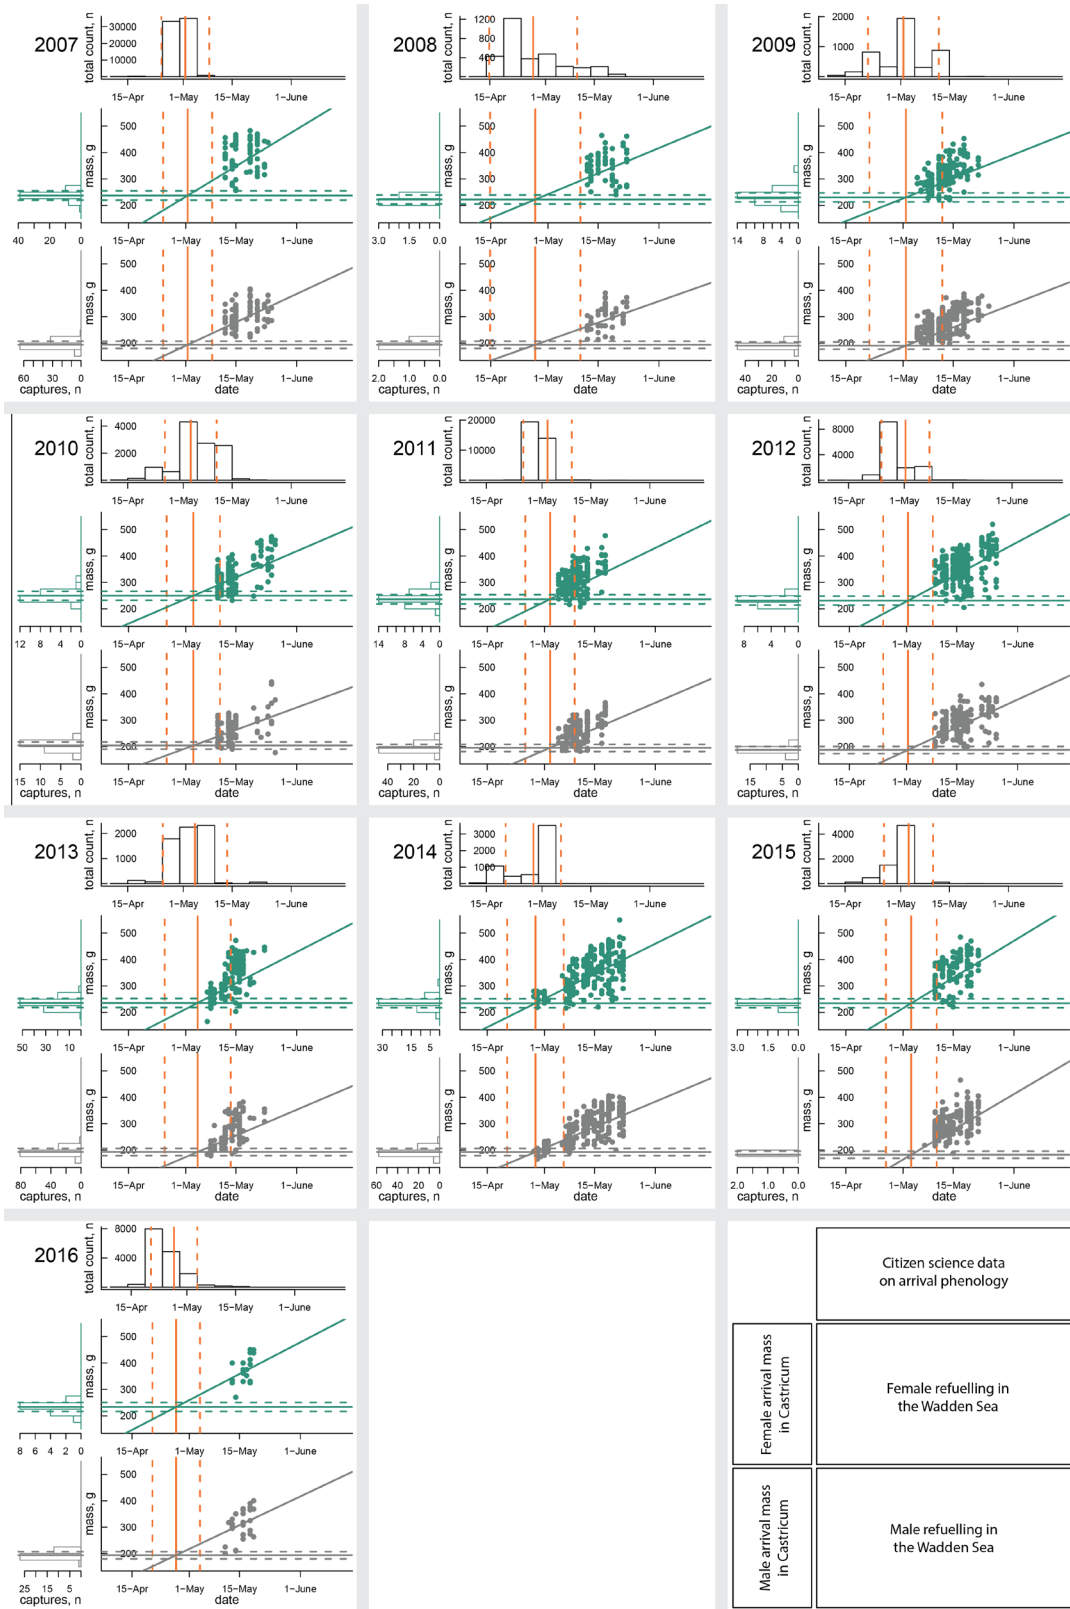

**Supplementary Figure 2.** Raw data and modelled results for citizen science arrival dates in the Netherlands (trektellen.nl), sex-specific arrival mass in captures in Castricum and refuelling in the Wadden Sea for 2007 – 2016. See Fig. 3 for more details.

**Supplementary Table 1.** *Limosa lapponica taymyrensis* breeding grounds phenology. Snowmelt represents date of snowmelt measured at the Southern Taimyr field site (72.8°N, 106.0°E). Arrival dates are obtained for Khatanga village region (72.0°N 102.5°E) and the appearance of crane-flies and clutch initiation dates were observed at southern Taimyr (72.8°N, 106.0°E).

| <b>Year</b> | <b>Snowmelt</b> | <b>First arrival to the breeding grounds</b> | <b>First crane-fly appearance</b> | <b>Clutch initiation</b> |
|-------------|-----------------|----------------------------------------------|-----------------------------------|--------------------------|
| 1992        |                 | 11-Jun-92                                    |                                   |                          |
| 1993        |                 | 05-Jun-93                                    |                                   |                          |
| 1994        | 22-Jun-94       |                                              | 06-Jul-94                         | 25-Jun-94;<br>02-Jul-94  |
| 1995        | 07-Jun-95       |                                              | 28-Jun-95                         | 14-Jun-95                |
| 1996        | 27-Jun-96       | 04-Jun-96                                    | 07-Jul-96                         | 27-Jun-96                |
| 1997        | 06-Jun-97       | 01-Jun-97                                    |                                   |                          |
| 1998        | 13-Jun-98       | 01-Jun-98                                    | 30-Jun-98                         |                          |
| 1999        | 04-Jun-99       |                                              | 29-Jun-99                         | 11-Jun-99                |
| 2000        | 14-Jun-00       | 02-Jun-00                                    | 06-Jul-00                         | 14-Jun-00                |
| 2001        | 06-Jun-01       | 01-Jun-01                                    | 25-Jun-01                         | 18-Jun-01                |
| 2002        | 11-Jun-02       | 29-May-02                                    | 22-Jun-02                         | 11-Jun-02                |
| 2003        | 16-Jun-03       | 04-Jun-03                                    | 26-Jun-03                         |                          |
| 2004        |                 | 07-Jun-04                                    |                                   |                          |
| 2005        |                 | 31-May-05                                    |                                   |                          |
| 2006        |                 | 01-Jun-06                                    |                                   |                          |
| 2007        |                 | 28-May-07                                    |                                   |                          |
| 2008        | 19-Jun-08       | 02-Jun-08                                    | 07-Jul-08                         |                          |
| 2009        | 10-Jun-09       | 30-May-09                                    | 27-Jun-09                         | 11-Jun-09                |
| 2010        | 25-May-10       | 02-Jun-10                                    | 23-Jun-10                         | 13-Jun-10;<br>22-Jun-10  |
| 2011        | 30-May-11       | 29-May-11                                    | 29-Jun-11                         | 07-Jun-11;<br>10-Jun-11  |
| 2012        | 03-Jun-12       | 30-May-12                                    | 21-Jun-12                         |                          |
| 2013        | 02-Jun-13       | 26-May-13                                    | 02-Jul-13                         |                          |
| 2014        | 08-Jun-14       | 24-May-14                                    | 19-Jun-14                         |                          |
| 2015        |                 | 03-Jun-15                                    |                                   |                          |
| 2016        |                 | 29-May-16                                    |                                   |                          |

**Supplementary Table 2.** Estimated coefficients from the structural equation model for bar-tailed godwit phenology

| <b>Effect of</b>    | <b>on</b>           | <b>mean</b> | <b>sd</b> | <b>median</b> | <b>2.5%</b> | <b>97.5%</b> | <b><math>P( b &gt;0)</math></b> |
|---------------------|---------------------|-------------|-----------|---------------|-------------|--------------|---------------------------------|
| Time                | Arrival Wadden Sea  | -0.046      | 0.065     | -0.047        | -0.170      | 0.084        | 0.77                            |
| Time                | Snowmelt            | -0.792      | 0.153     | -0.793        | -1.090      | -0.489       | 1.00                            |
| Time                | Arrival to Taimyr   | -0.176      | 0.181     | -0.175        | -0.530      | 0.182        | 0.84                            |
| Snowmelt            | Arrival to Taimyr   | 0.198       | 0.172     | 0.197         | -0.140      | 0.538        | 0.88                            |
| Arrival Wadden Sea  | Arrival to Taimyr   | 0.240       | 0.445     | 0.241         | -0.650      | 1.112        | 0.71                            |
| Time                | Crane fly emergence | -0.152      | 0.354     | -0.150        | -0.860      | 0.558        | 0.68                            |
| Snowmelt            | Crane fly emergence | 0.274       | 0.302     | 0.273         | -0.320      | 0.878        | 0.83                            |
| Time                | Clutch Initiation   | 0.116       | 0.647     | 0.104         | -1.150      | 1.445        | 0.57                            |
| Snowmelt            | Clutch Initiation   | 0.239       | 0.489     | 0.237         | -0.760      | 1.226        | 0.71                            |
| Arrival to Taimyr   | Clutch Initiation   | 1.604       | 1.239     | 1.667         | -1.07       | 3.980        | 0.90                            |
| Crane fly emergence | Clutch Initiation   | 0.036       | 0.536     | 0.013         | -1.01       | 1.176        | 0.51                            |
